# Supplementary figures and images for: ZJUSAH Classification: A New Classification for Primary Brainstem Hemorrhage
Source: MDPI journal article supplement (doi:10.3390/life13030846), 2023-03-21

Type 2

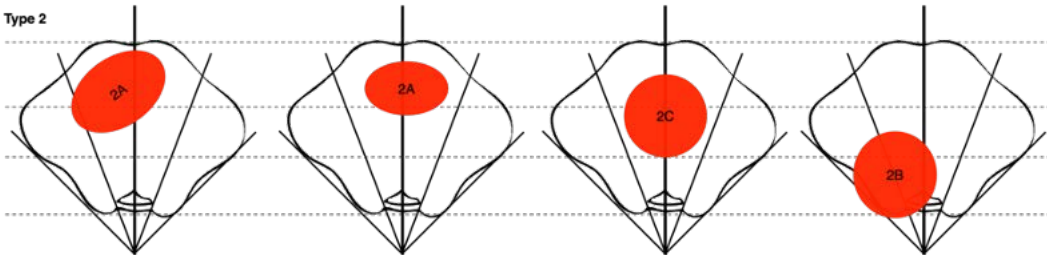

Type 3

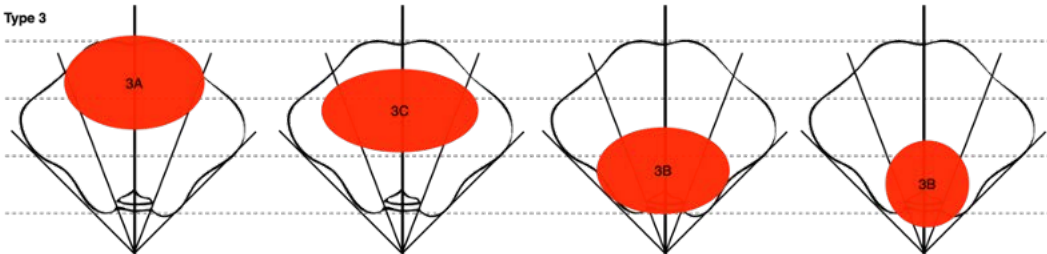

Supplement: s1 [file s1]
